# Supplementary material for: Key Physicochemical Determinants in the Antimicrobial Peptide RiLK1 Promote Amphipathic Structures
Source: MDPI journal article supplement (doi:10.3390/ijms221810011), 2021-09-16
Supplement: s1 [file s1]

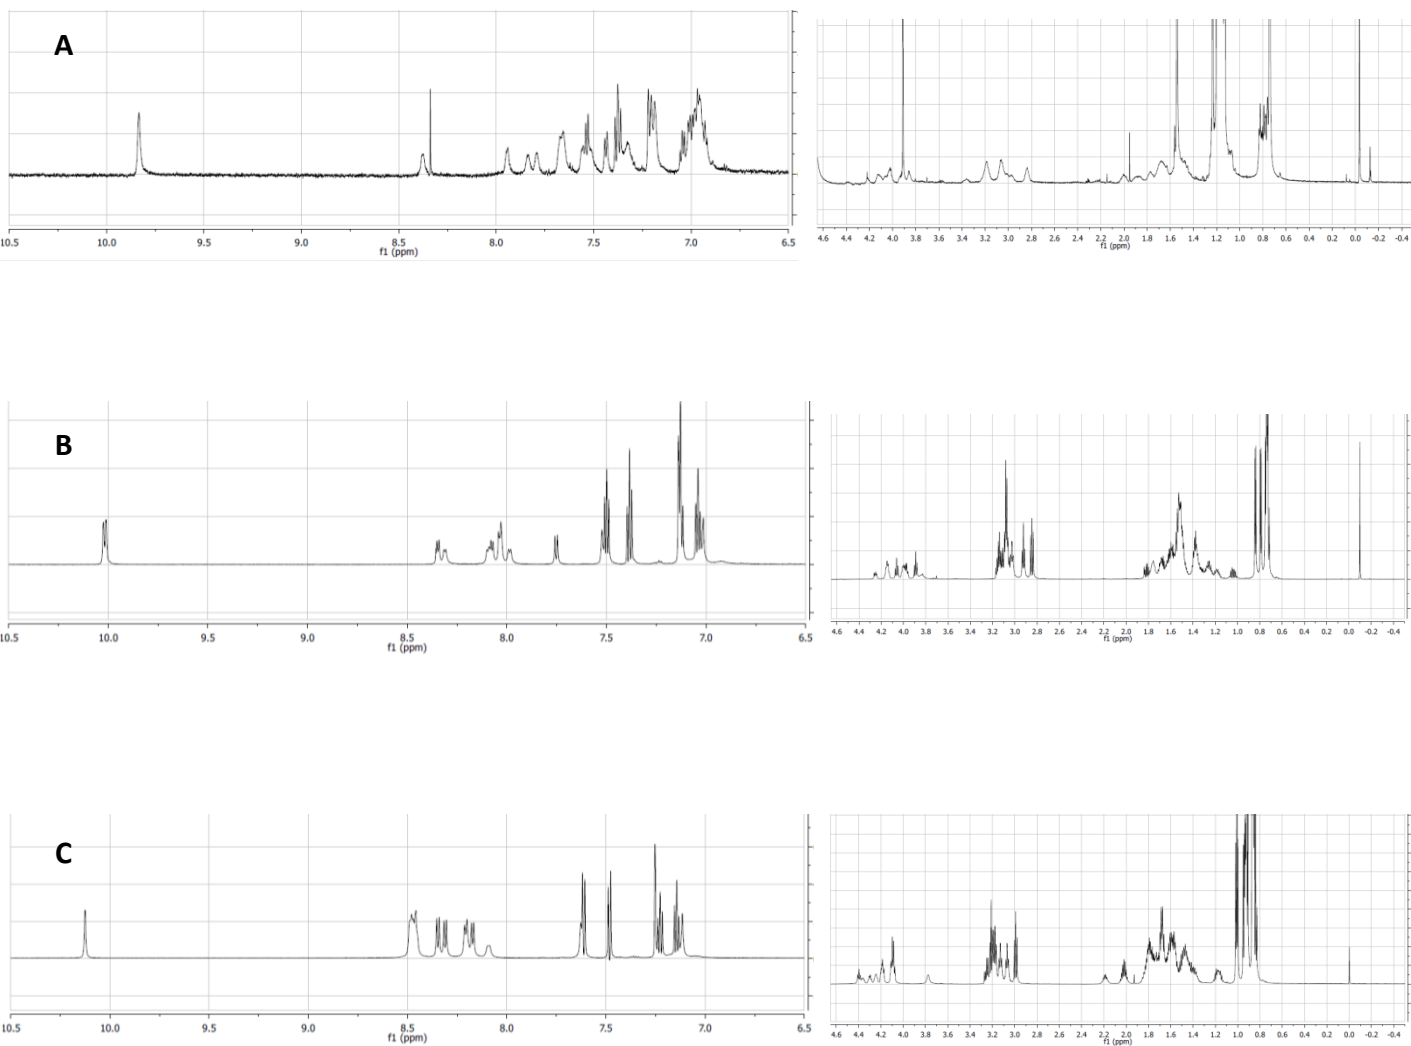

**Figure S9.  $^1\text{H}$  NMR spectra of RiLK1 1.0 mM A) in SDS micelles 150 mM pH 4.4, B) in water pH 4; and C) of 1018-K6 1.0 mM in water pH 4. Low field (left) and high field regions (right).**
