# Supplementary material for: Key Physicochemical Determinants in the Antimicrobial Peptide RiLK1 Promote Amphipathic Structures
Source: MDPI journal article supplement (doi:10.3390/ijms221810011), 2021-09-16
Supplement: s1 [file s1]

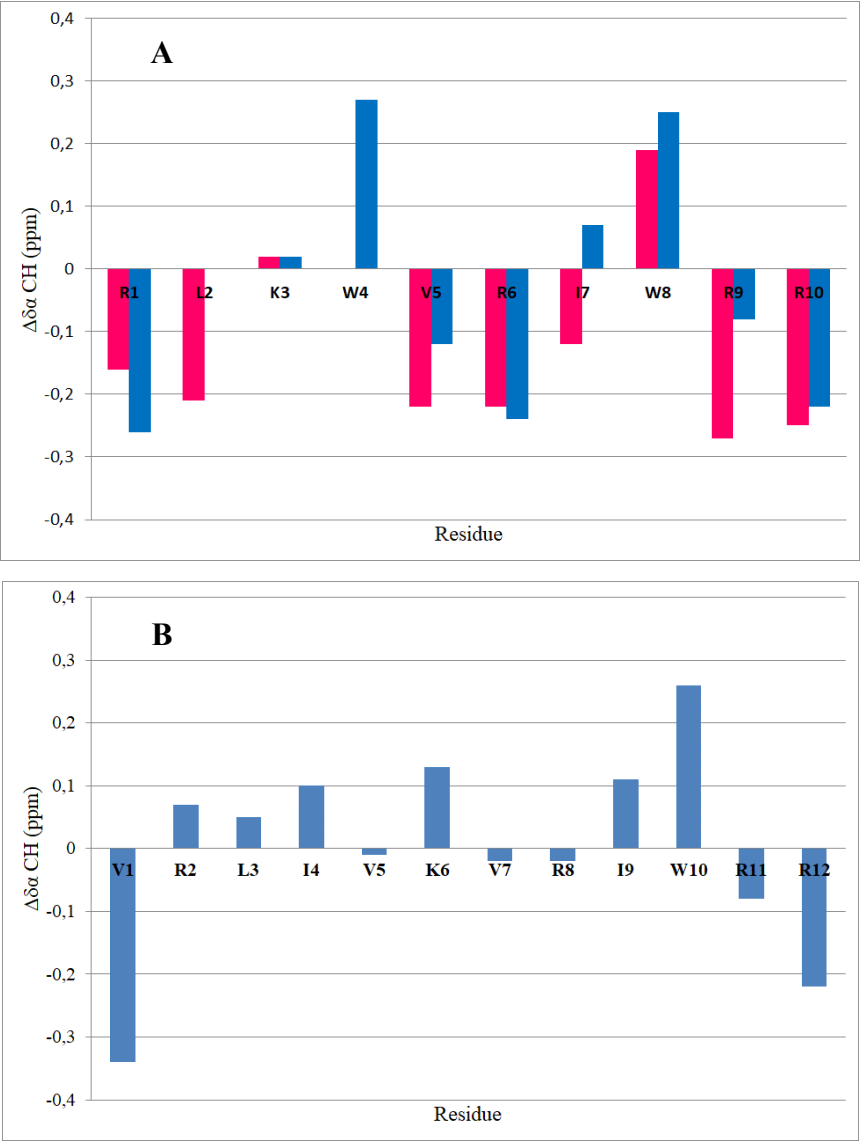

**Figure S10. Chemical shift deviations (ppm) from random coil values of aCH protons of A) RiLK1 peptide in water (blue bars) and in SDS micelles 150 mM pH 4.4 (fuchsia bars) and B) 1018-K6 peptide in water.**
