# Supplementary material for: Key Physicochemical Determinants in the Antimicrobial Peptide RiLK1 Promote Amphipathic Structures
Source: MDPI journal article supplement (doi:10.3390/ijms221810011), 2021-09-16
Supplement: s1 [file s1]

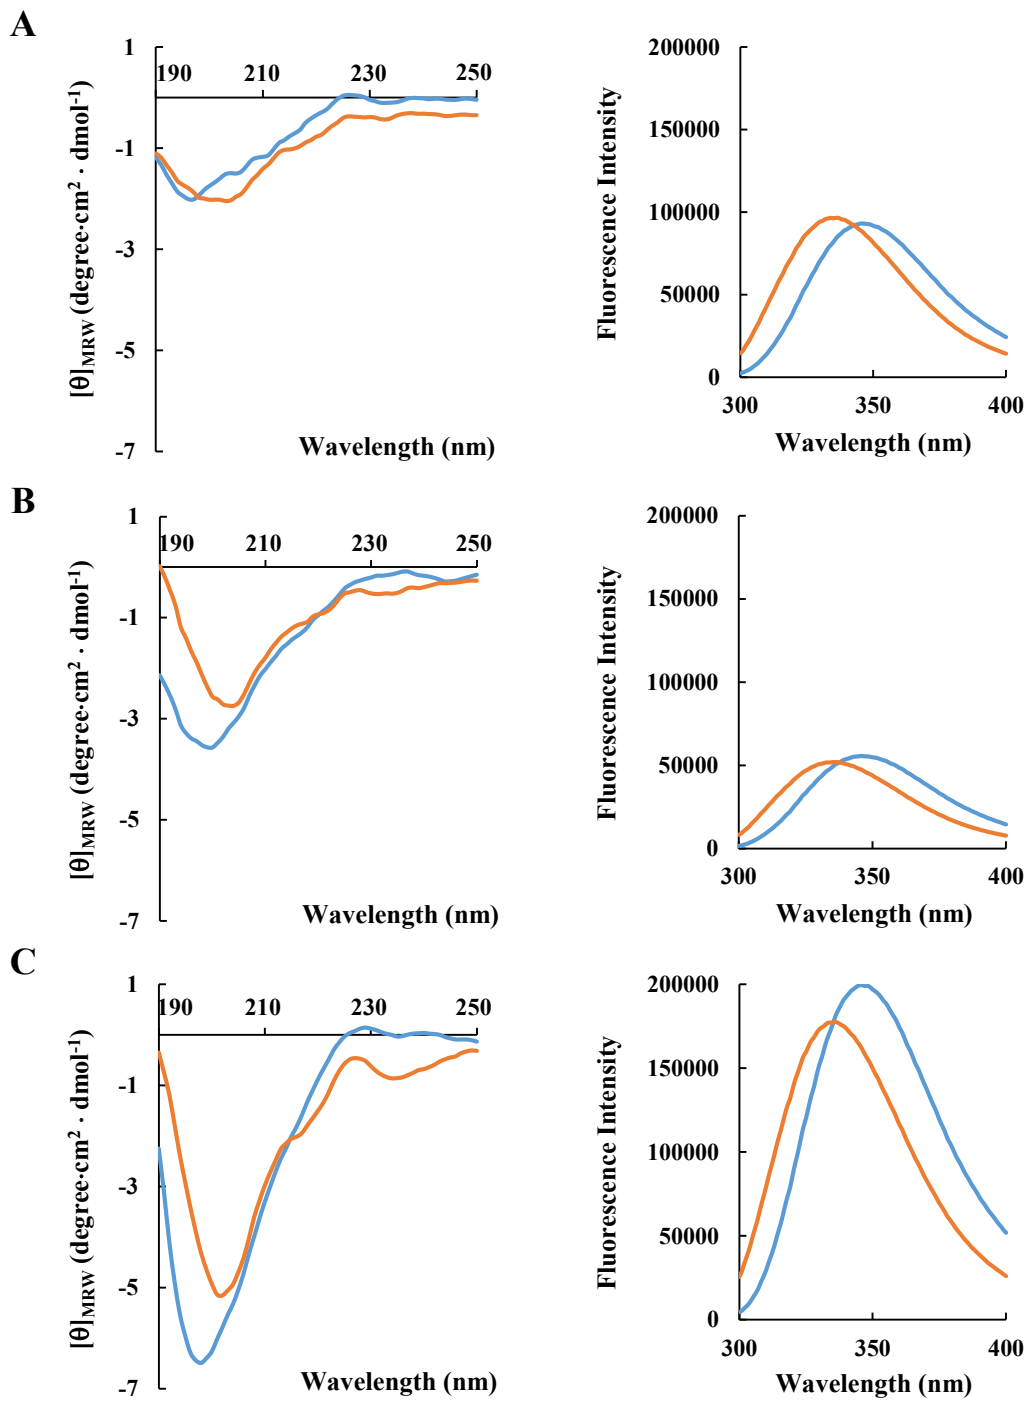

**Figure S3. CD (left) and fluorescence (right) spectra of RiLK1 at increasing peptide concentration. (A) 12.5  $\mu$ M, (B) 25  $\mu$ M and (C) 50  $\mu$ M in water pH 4.0 (blue lines) and with 50 mM SDS (orange lines).**
