# Supplementary material for: Key Physicochemical Determinants in the Antimicrobial Peptide RiLK1 Promote Amphipathic Structures
Source: MDPI journal article supplement (doi:10.3390/ijms221810011), 2021-09-16
Supplement: s1 [file s1]

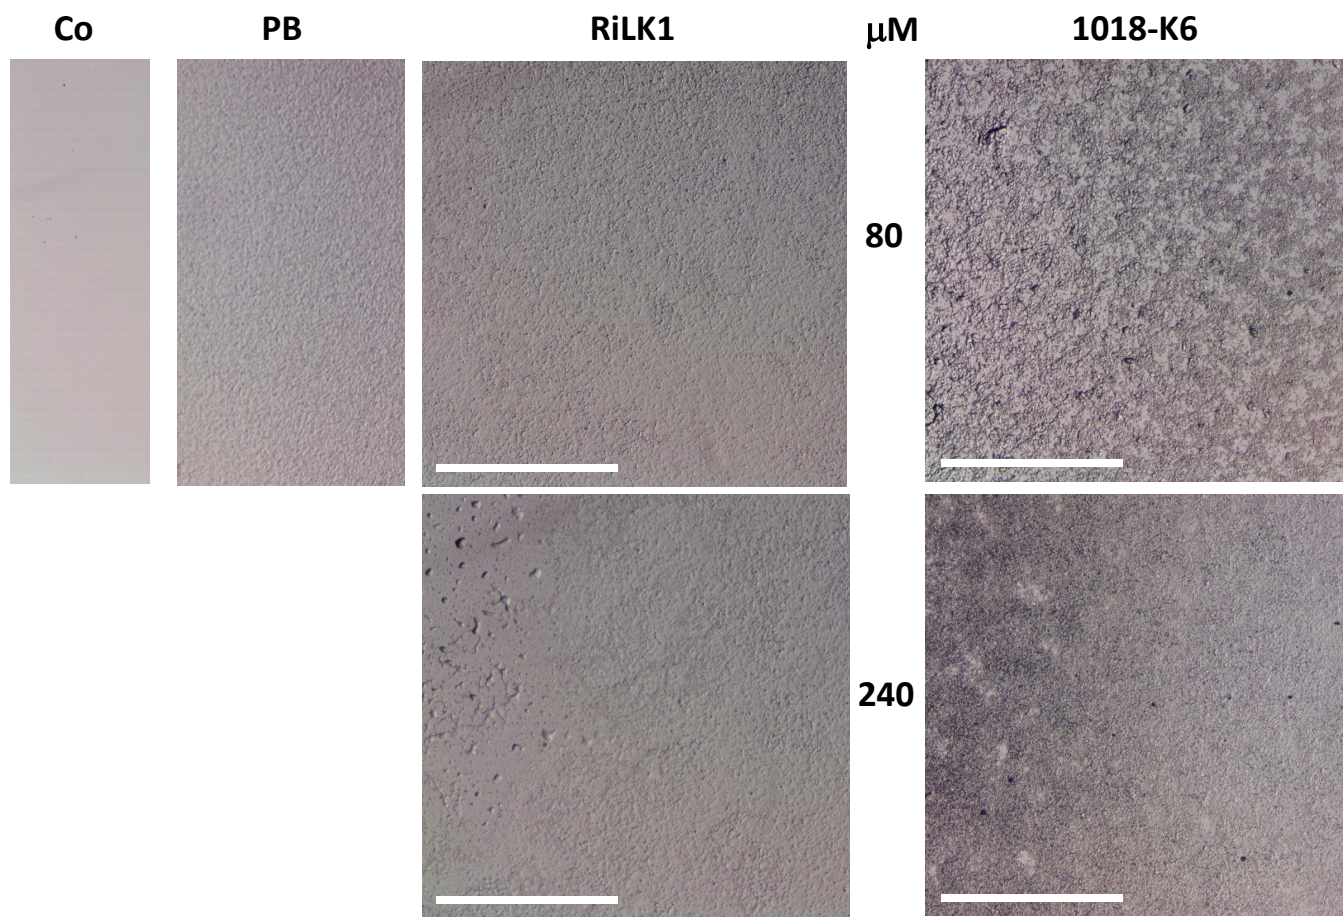

**Figure S2. Stereomicroscopic analysis of RILK1 and 1018-K6 in PB.** The two peptides were resuspended in phosphate buffer (PB), dried at 60 °C O/N and observed at stereomicroscope Leica MZ16-FA. The plate and PB alone were used as controls. Bar is equal to 1mm.
