# Supplementary material for: Key Physicochemical Determinants in the Antimicrobial Peptide RiLK1 Promote Amphipathic Structures
Source: MDPI journal article supplement (doi:10.3390/ijms221810011), 2021-09-16
Supplement: s1 [file s1]

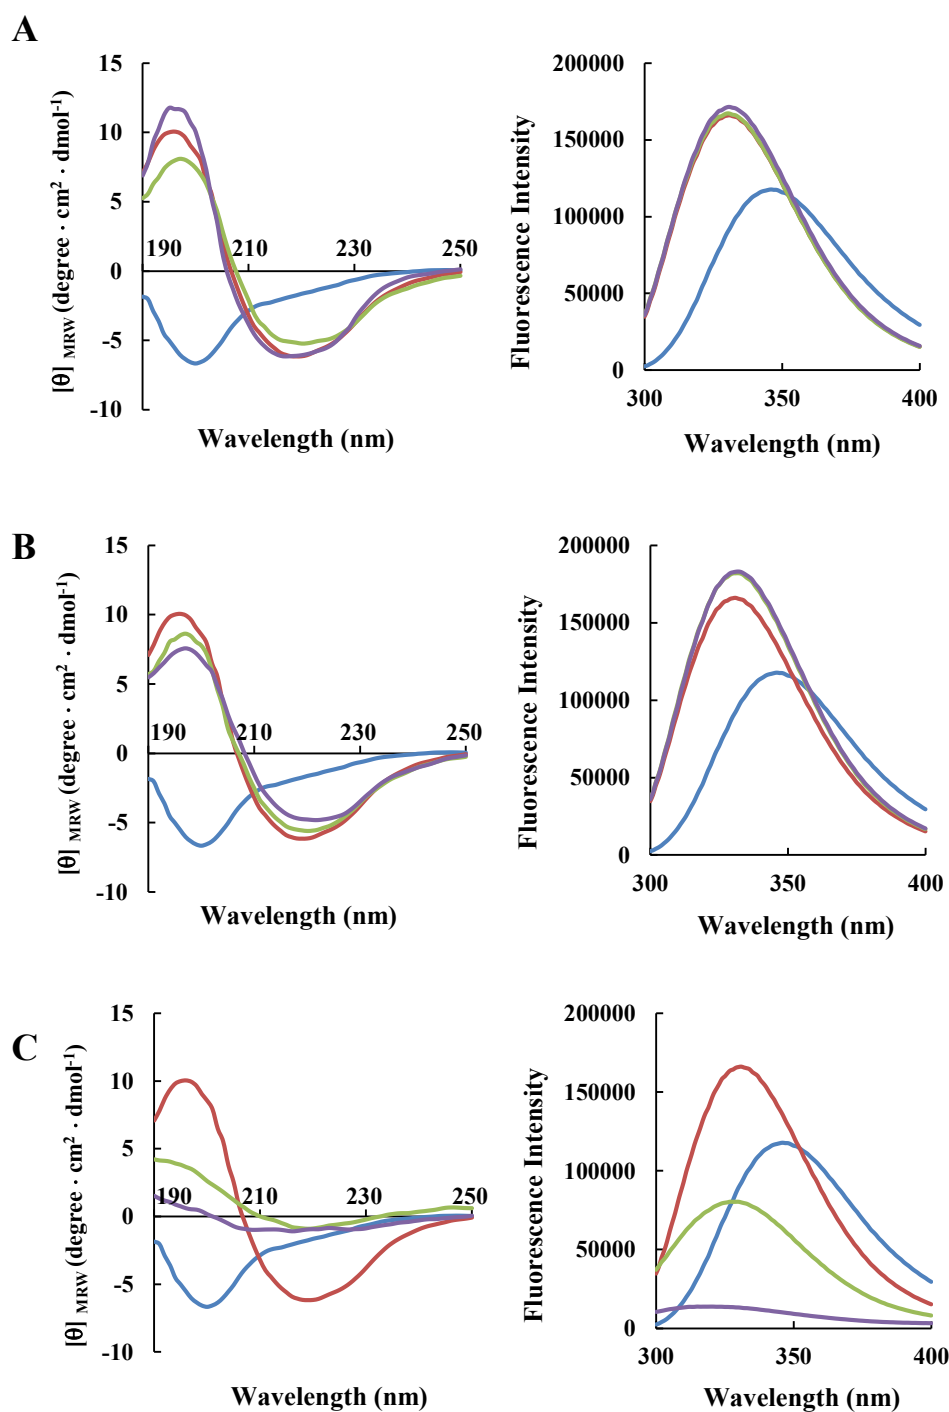

**Figure S7. Thermostability of 1018-K6 monitored by spectroscopic techniques.** CD and fluorescence spectra of 1018-K6 at 50  $\mu$ M concentration were recorded in water at (A) 4  $^{\circ}$ C, (B) 37  $^{\circ}$ C and (C) 90  $^{\circ}$ C, respectively, in the presence of 150 mM SDS up to 48 h incubations. The spectra of peptide samples in absence of SDS (blue lines) were also reported. The spectra were recorded at t=0 (magenta lines), t=24 h (green lines) or t=48 h (purple lines).
