# Supplementary material for: Key Physicochemical Determinants in the Antimicrobial Peptide RiLK1 Promote Amphipathic Structures
Source: MDPI journal article supplement (doi:10.3390/ijms221810011), 2021-09-16
Supplement: s1 [file s1]

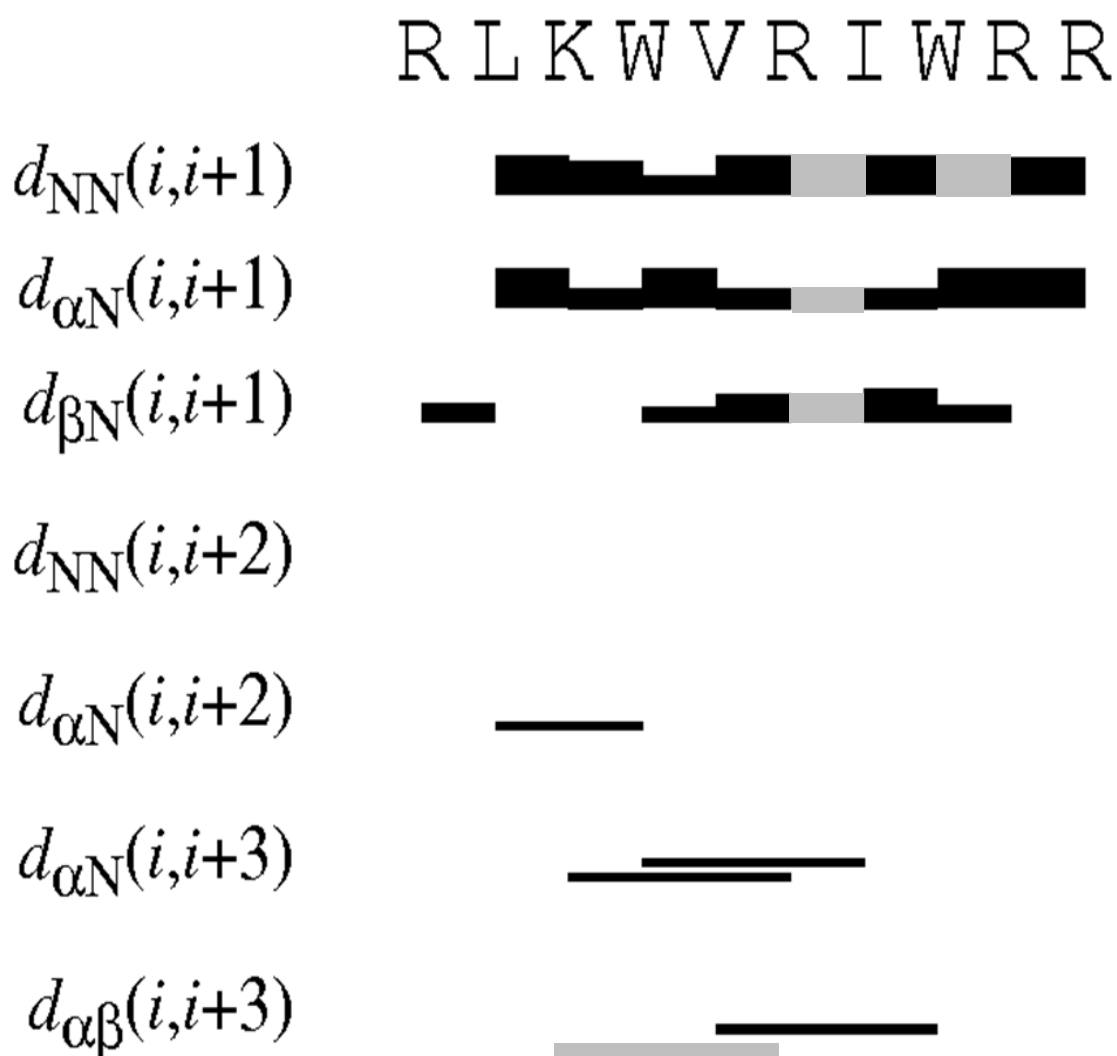

**Figure S11. Most relevant NOE effects measured for RiLK1 peptide in SDS.** Gray boxes indicate possible NOEs not measured for spectral overlapping and not included as upl in CYANA calculations.
