# Supplementary material for: Key Physicochemical Determinants in the Antimicrobial Peptide RiLK1 Promote Amphipathic Structures
Source: MDPI journal article supplement (doi:10.3390/ijms221810011), 2021-09-16
Supplement: s1 [file s1]

**Table S1.** Secondary structure contents of (A) RiLK1 and (B) 1018-K6 at 50  $\mu$ M concentration in water pH 4 in presence of different concentrations of SDS determined by Dichroweb server (K2D).

**A**

|            | $\alpha$ -helix | $\beta$ -sheet | Random coil |
|------------|-----------------|----------------|-------------|
| SDS 50 mM  | 27%             | 32%            | 40%         |
| SDS 150 mM | 27%             | 33%            | 40%         |

**B**

|            | $\alpha$ -helix | $\beta$ -sheet | Random coil |
|------------|-----------------|----------------|-------------|
| SDS 50 mM  | 0%              | 100%           | 0%          |
| SDS 150 mM | 0%              | 100%           | 0%          |

**Table S2.** Secondary structure contents of **(A)** RiLK1 and **(B)** 1018-K6 at different concentrations in water pH 4.0 in presence of 50 mM SDS determined by Dichroweb server (K2D).

**A**

|                                     | $\alpha$ -helix | $\beta$ -sheet | Random coil |
|-------------------------------------|-----------------|----------------|-------------|
| <b>RiLK1 12.5 <math>\mu</math>M</b> | 8%              | 46%            | 46%         |
| <b>RiLK1 25 <math>\mu</math>M</b>   | 8%              | 45%            | 47%         |
| <b>RiLK1 50 <math>\mu</math>M</b>   | 19%             | 32%            | 49%         |

**B**

|                                       | $\alpha$ -helix | $\beta$ -sheet | Random coil |
|---------------------------------------|-----------------|----------------|-------------|
| <b>1018-K6 12.5 <math>\mu</math>M</b> | 35%             | 15%            | 50%         |
| <b>1018-K6 25 <math>\mu</math>M</b>   | 21%             | 54%            | 25%         |
| <b>1018-K6 50 <math>\mu</math>M</b>   | 12%             | 82%            | 5%          |

**Table S3.** Secondary structure contents of (A) 1018-K6 and (B) RiLK1 50  $\mu$ M concentration in water pH 4 in presence of 150 mM SDS at different times determined by Dichroweb server (K2D).

| <b>A</b> |                     | <b><math>\alpha</math>-helix</b> | <b><math>\beta</math>-sheet</b> | <b>Random coil</b> |
|----------|---------------------|----------------------------------|---------------------------------|--------------------|
|          | <b>t=0 with SDS</b> | 0%                               | 100%                            | 0%                 |
|          | <b>t=5 min</b>      | 0%                               | 100%                            | 0%                 |
|          | <b>t=10 min</b>     | 7%                               | 90%                             | 3%                 |
|          | <b>t=30 min</b>     | 0%                               | 99%                             | 0%                 |
|          | <b>t=60 min</b>     | 8%                               | 89%                             | 3%                 |
|          | <b>t=90 min</b>     | 9%                               | 96%                             | 1%                 |
|          | <b>t=120 min</b>    | 9%                               | 96%                             | 1%                 |
|          | <b>t=150 min</b>    | 7%                               | 90%                             | 3%                 |
|          | <b>t=180 min</b>    | 6%                               | 92%                             | 3%                 |
|          | <b>t=240 min</b>    | 13%                              | 82%                             | 5%                 |
|          | <b>t=300 min</b>    | 14%                              | 80%                             | 6%                 |
|          | <b>t=360 min</b>    | 12%                              | 83%                             | 5%                 |
|          | <b>t=1320 min</b>   | 12%                              | 83%                             | 5%                 |
|          | <b>t=1440 min</b>   | 14%                              | 80%                             | 6%                 |

  

| <b>B</b> |                     | <b><math>\alpha</math>-helix</b> | <b><math>\beta</math>-sheet</b> | <b>Random coil</b> |
|----------|---------------------|----------------------------------|---------------------------------|--------------------|
|          | <b>t=0 with SDS</b> | 11%                              | 35%                             | 54%                |
|          | <b>t=5 min</b>      | 21%                              | 31%                             | 48%                |
|          | <b>t=10 min</b>     | 9%                               | 42%                             | 49%                |
|          | <b>t=30 min</b>     | 11%                              | 37%                             | 52%                |
|          | <b>t=60 min</b>     | 11%                              | 37%                             | 52%                |
|          | <b>t=90 min</b>     | 13%                              | 34%                             | 53%                |
|          | <b>t=120 min</b>    | 8%                               | 43%                             | 48%                |
|          | <b>t=150 min</b>    | 11%                              | 36%                             | 53%                |
|          | <b>t=180 min</b>    | 22%                              | 30%                             | 48%                |
|          | <b>t=240 min</b>    | 15%                              | 34%                             | 51%                |
|          | <b>t=300 min</b>    | 10%                              | 38%                             | 52%                |
|          | <b>t=360 min</b>    | 21%                              | 31%                             | 48%                |
|          | <b>t=1320 min</b>   | 26%                              | 33%                             | 41%                |
|          | <b>t=1440 min</b>   | 25%                              | 32%                             | 43%                |

**Table S4.** Secondary structure contents of (A) 1018-K6 and (B) RiLK1 at 50  $\mu$ M concentration in water at different pHs in presence of 150 mM SDS determined by Dichroweb server (K2D).

**A**

|                |                     | $\alpha$ -helix | $\beta$ -sheet | Random coil |
|----------------|---------------------|-----------------|----------------|-------------|
| <b>pH 2.0</b>  | <b>t=0 with SDS</b> | 9%              | 87%            | 4%          |
|                | <b>t=24 h</b>       | 4%              | 94%            | 2%          |
|                | <b>t=48 h</b>       | 9%              | 87%            | 4%          |
| <b>pH 7.0</b>  | <b>t=0 with SDS</b> | 0%              | 100%           | 0%          |
|                | <b>t=24 h</b>       | 4%              | 94%            | 2%          |
|                | <b>t=48 h</b>       | 0%              | 100%           | 0%          |
| <b>pH 12.0</b> | <b>t=0 with SDS</b> | 79%             | 0%             | 21%         |
|                | <b>t=24 h</b>       | 62%             | 6%             | 31%         |
|                | <b>t=48 h</b>       | 58%             | 9%             | 34%         |

**B**

|                |                     | $\alpha$ -helix | $\beta$ -sheet | Random coil |
|----------------|---------------------|-----------------|----------------|-------------|
| <b>pH 2.0</b>  | <b>t=0 with SDS</b> | 11%             | 37%            | 52%         |
|                | <b>t=24 h</b>       | 7%              | 51%            | 42%         |
|                | <b>t=48 h</b>       | 8%              | 46%            | 47%         |
| <b>pH 7.0</b>  | <b>t=0 SDS</b>      | 7%              | 51%            | 42%         |
|                | <b>t=24 h</b>       | 8%              | 45%            | 47%         |
|                | <b>t=48 h</b>       | 7%              | 51%            | 42%         |
| <b>pH 12.0</b> | <b>t=0 with SDS</b> | 10%             | 35%            | 55%         |
|                | <b>t=24 h</b>       | 7%              | 48%            | 45%         |
|                | <b>t=48 h</b>       | 7%              | 51%            | 42%         |

**Table S5.** Secondary structure contents of (A) 1018-K6 and (B) RiLK1 at 50  $\mu$ M concentration in water pH 4.0 in presence of 150 mM SDS at different temperatures determined by Dichroweb server (K2D).

**A**

|              |                     | $\alpha$ -helix | $\beta$ -sheet | Random coil |
|--------------|---------------------|-----------------|----------------|-------------|
| <b>4 °C</b>  | <b>t=0 with SDS</b> | 0%              | 100%           | 0%          |
|              | <b>t=24 h</b>       | 0%              | 100%           | 0%          |
|              | <b>t=48 h</b>       | 1%              | 99%            | 1%          |
| <b>37 °C</b> | <b>t=0 with SDS</b> | 0%              | 100%           | 0%          |
|              | <b>t=24 h</b>       | 0%              | 100%           | 0%          |
|              | <b>t=48 h</b>       | 2%              | 96%            | 2%          |
| <b>90 °C</b> | <b>t=0 with SDS</b> | 0%              | 100%           | 0%          |
|              | <b>t=24 h</b>       | 2%              | 51%            | 47%         |
|              | <b>t=48 h</b>       | 12%             | 39%            | 49%         |

**B**

|              |                     | $\alpha$ -helix | $\beta$ -sheet | Random coil |
|--------------|---------------------|-----------------|----------------|-------------|
| <b>4 °C</b>  | <b>t=0 with SDS</b> | 8%              | 44%            | 48%         |
|              | <b>t=24 h</b>       | 7%              | 51%            | 42%         |
|              | <b>t=48 h</b>       | 8%              | 45%            | 47%         |
| <b>37 °C</b> | <b>t=0 with SDS</b> | 8%              | 44%            | 48%         |
|              | <b>t=24 h</b>       | 7%              | 51%            | 42%         |
|              | <b>t=48 h</b>       | 7%              | 48%            | 44%         |
| <b>90 °C</b> | <b>t=0 with SDS</b> | 8%              | 44%            | 48%         |
|              | <b>t=24 h</b>       | 7%              | 51%            | 42%         |
|              | <b>t=48 h</b>       | 7%              | 50%            | 42%         |
